# Supplementary material for: Development of Prognostic Features of Hepatocellular Carcinoma Based on Metabolic Gene Classification and Immune and Oxidative Stress Characteristic Analysis
Source: PubMed Central journal article supplement (PMC9969974; doi:10.1155/2023/1847700), 2023-02-18
Supplement: 1847700.f1.pdf [file 1847700.f1.pdf]

**Table S1. Clinical Features of datasets**

| <b>Clinical Features</b> | <b>TCGA-LIHC</b> | <b>GSE14520</b> | <b>HCCDB18</b> |
|--------------------------|------------------|-----------------|----------------|
| <b>OS</b>                |                  |                 |                |
| Alive                    | 235              | 136             | 168            |
| Dead                     | 130              | 85              | 35             |
| <b>T Stage</b>           |                  |                 |                |
| T1                       | 180              |                 | 33             |
| T2                       | 91               |                 | 96             |
| T3                       | 78               |                 | 59             |
| T4                       | 13               |                 | 15             |
| TX                       | 3                |                 |                |
| <b>N Stage</b>           |                  |                 |                |
| N0                       | 248              |                 |                |
| N1                       | 4                |                 |                |
| NX                       | 113              |                 |                |
| <b>M Stage</b>           |                  |                 |                |
| M0                       | 263              |                 |                |
| M1                       | 3                |                 |                |
| MX                       | 99               |                 |                |
| <b>Stage</b>             |                  |                 |                |
| I                        | 170              | 93              |                |
| II                       | 84               | 77              |                |
| III                      | 83               | 49              |                |
| IV                       | 4                | 0               |                |
| X                        | 24               | 2               |                |
| <b>Grade</b>             |                  |                 |                |
| G1                       | 55               |                 |                |
| G2                       | 175              |                 |                |
| G3                       | 118              |                 |                |
| G4                       | 12               |                 |                |
| GX                       | 5                |                 |                |
| <b>Gender</b>            |                  |                 |                |
| Male                     | 119              | 191             | 153            |
| Female                   | 246              | 30              | 50             |
| <b>Age</b>               |                  |                 |                |
| ≤ 60                     | 173              | 181             | 43             |
| >60                      | 192              | 40              | 160            |
