# Supplementary material for: Development of Prognostic Features of Hepatocellular Carcinoma Based on Metabolic Gene Classification and Immune and Oxidative Stress Characteristic Analysis
Source: PubMed Central journal article supplement (PMC9969974; doi:10.1155/2023/1847700), 2023-02-18
Supplement: 1847700.f2.pdf [file 1847700.f2.pdf]

**Table S2. Prognosis genes in GSE14520 dataset**

| <b>Genes</b> | <b>p.value</b> | <b>HR</b> | <b>Low 95%CI</b> | <b>High 95%CI</b> |
|--------------|----------------|-----------|------------------|-------------------|
| FH           | 0.0372526      | 0.7166647 | 0.523814         | 0.9805166         |
| AGL          | 0.0023033      | 0.7392162 | 0.6086795        | 0.8977477         |
| GAA          | 0.0054776      | 0.6722718 | 0.5079855        | 0.8896895         |
| GCK          | 0.0409042      | 0.6080659 | 0.3774283        | 0.9796407         |
| HK2          | 0.000237       | 1.5710863 | 1.234778         | 1.9989927         |
| HK1          | 0.0281762      | 0.7057886 | 0.5170614        | 0.9634013         |
| NNT          | 0.0252699      | 0.8109973 | 0.6750176        | 0.9743696         |
| POR          | 0.0196865      | 0.7831195 | 0.6376826        | 0.9617263         |
| RHD          | 0.0460233      | 0.3545794 | 0.1280486        | 0.9818662         |
| SCD          | 0.0026011      | 1.2380389 | 1.0773999        | 1.422629          |
| TKT          | 0.0410406      | 1.2089482 | 1.0077528        | 1.4503118         |
| TPR          | 0.007821       | 1.5805792 | 1.1279927        | 2.2147579         |
| UBB          | 0.0017776      | 0.3530431 | 0.1837541        | 0.6782948         |
| PFKFB1       | 0.0075522      | 0.7682721 | 0.6331713        | 0.9321996         |
| PFKFB3       | 0.0032731      | 1.2446927 | 1.0757389        | 1.4401822         |
| ALDH9A1      | 0.0187712      | 0.6841382 | 0.4984848        | 0.9389357         |
| ALDH7A1      | 0.0012566      | 0.7196185 | 0.589219         | 0.8788766         |
| ALDH1A1      | 0.0185142      | 0.8297822 | 0.7104383        | 0.9691742         |
| ALDH1B1      | 0.0149515      | 0.6629755 | 0.476138         | 0.9231284         |
| SULT4A1      | 0.0004808      | 0.3216536 | 0.1701532        | 0.6080464         |
| SULT2A1      | 0.0020983      | 0.8551374 | 0.7739803        | 0.9448043         |
| SULT1A1      | 0.0028146      | 0.7425844 | 0.6108608        | 0.9027125         |
| SULT1A2      | 0.0069443      | 0.7309549 | 0.5821955        | 0.9177245         |
| SULT1B1      | 0.0234459      | 0.6300244 | 0.4224929        | 0.9394968         |
| SLC25A10     | 0.005997       | 0.596734  | 0.4129117        | 0.8623912         |
| GLYAT        | 0.0036085      | 0.8291239 | 0.7308306        | 0.940637          |
| GRHPR        | 0.0002038      | 0.6734449 | 0.5466381        | 0.8296678         |
| GSTK1        | 0.0017233      | 0.667746  | 0.5187187        | 0.8595888         |
| GSTA1        | 0.0255028      | 0.8170764 | 0.6843486        | 0.9755464         |
| B3GNT2       | 0.023944       | 0.5935323 | 0.3773936        | 0.933457          |
| HPSE2        | 0.028858       | 0.3448681 | 0.1327406        | 0.8959887         |
| SLC16A3      | 5.90E-05       | 2.685953  | 1.658533         | 4.349834          |
| SLC35D1      | 0.0381127      | 0.7680662 | 0.5985215        | 0.9856383         |
| MAN2C1       | 0.0126595      | 0.5986226 | 0.3999156        | 0.8960617         |
| B4GALT5      | 0.0431245      | 1.3638781 | 1.009642         | 1.8423989         |
| ACY1         | 0.0228552      | 0.8036161 | 0.6656966        | 0.9701099         |
| ADH5         | 0.0015125      | 0.5661567 | 0.398374         | 0.8046042         |
| ADH6         | 0.0019769      | 0.7817936 | 0.6689011        | 0.9137395         |
| AOC3         | 0.0412636      | 1.4282885 | 1.0142324        | 2.0113813         |
| BPHL         | 0.009605       | 0.7198275 | 0.5612753        | 0.9231683         |
| CES2         | 0.0043373      | 0.8324845 | 0.7339506        | 0.9442468         |
| CES1         | 0.0049735      | 0.8509172 | 0.76026          | 0.9523848         |

|         |           |           |           |           |
|---------|-----------|-----------|-----------|-----------|
| CYP2A13 | 0.0210713 | 0.5767926 | 0.3613786 | 0.9206126 |
| CPT2    | 0.005016  | 0.65859   | 0.4919486 | 0.881679  |
| CYP26B1 | 0.0040474 | 1.3017556 | 1.0875183 | 1.558197  |
| CYP27A1 | 0.0067785 | 0.7945799 | 0.672741  | 0.9384847 |
| CYP21A2 | 0.0374072 | 1.3107432 | 1.0158992 | 1.6911597 |
| DCXR    | 0.0004747 | 0.7652024 | 0.6585552 | 0.8891201 |
| DERA    | 0.0136682 | 0.7416354 | 0.5848075 | 0.94052   |
| CYP3A43 | 0.0005406 | 0.6616345 | 0.5235991 | 0.8360599 |
| ENO1    | 0.0162626 | 1.3123844 | 1.0513937 | 1.6381616 |
| ENO2    | 0.0047319 | 1.3475779 | 1.0956254 | 1.6574701 |
| CYP4F12 | 0.0307656 | 0.7592174 | 0.5913113 | 0.9748015 |
| CYP4A11 | 0.0002582 | 0.7798404 | 0.6824622 | 0.8911133 |
| FBP1    | 0.003039  | 0.8081134 | 0.7019124 | 0.9303829 |
| FDX1    | 0.0056544 | 0.6921609 | 0.5333684 | 0.8982285 |
| FMO3    | 0.0384553 | 0.9066205 | 0.826254  | 0.9948038 |
| G6PD    | 0.0005562 | 1.313193  | 1.1249856 | 1.5328871 |
| G6PC    | 0.0037064 | 0.8456285 | 0.7550923 | 0.94702   |
| GCDH    | 0.0037029 | 0.7071059 | 0.5595557 | 0.8935639 |
| GCLC    | 0.020313  | 0.753601  | 0.5934335 | 0.9569975 |
| GOT2    | 0.0005496 | 0.6693945 | 0.5330948 | 0.840543  |
| GYS2    | 0.0274195 | 0.8814905 | 0.7880141 | 0.9860553 |
| HADH    | 0.0065662 | 0.6989889 | 0.5399087 | 0.904941  |
| HAGH    | 5.35E-05  | 0.6669448 | 0.5479511 | 0.8117793 |
| LDHA    | 0.0010256 | 2.0089719 | 1.3247058 | 3.0466902 |
| MAOB    | 0.0034052 | 0.7494792 | 0.6179335 | 0.9090284 |
| MAOA    | 0.0041864 | 0.7621579 | 0.6328728 | 0.9178537 |
| MDH2    | 0.0043813 | 0.5899082 | 0.4103115 | 0.848116  |
| NAT1    | 0.0202609 | 0.7307975 | 0.5607955 | 0.9523345 |
| NAT2    | 0.0208862 | 0.8338719 | 0.7147524 | 0.9728438 |
| OGDH    | 0.0220521 | 0.7135546 | 0.5345022 | 0.9525876 |
| PCK1    | 0.0063076 | 0.8837361 | 0.8087322 | 0.9656961 |
| PCK2    | 0.0016874 | 0.7705902 | 0.654919  | 0.9066911 |
| PDK2    | 0.0030834 | 0.4609639 | 0.2760013 | 0.7698795 |
| PECR    | 0.005511  | 0.7579719 | 0.6232604 | 0.9218    |
| PHKB    | 0.045081  | 0.7245099 | 0.5286363 | 0.9929596 |
| PYGL    | 0.0004192 | 0.6845389 | 0.5545576 | 0.8449861 |
| RBKS    | 0.0343271 | 0.7360117 | 0.554112  | 0.9776239 |
| SDC1    | 0.0422443 | 0.8220547 | 0.680428  | 0.9931602 |
| SDHD    | 0.0074169 | 0.6888857 | 0.5244085 | 0.90495   |
| SDHA    | 0.0344568 | 0.6537214 | 0.4408514 | 0.9693781 |
| SMOX    | 0.0422647 | 1.890999  | 1.0225038 | 3.4971775 |
| SORD    | 0.0026415 | 0.7840535 | 0.6690704 | 0.9187969 |
| TPMT    | 0.0167195 | 0.6026625 | 0.3980452 | 0.9124644 |
| UGP2    | 0.000888  | 0.6851044 | 0.5481591 | 0.8562625 |

|         |           |           |           |           |
|---------|-----------|-----------|-----------|-----------|
| AKR7A2  | 0.0259421 | 0.7178151 | 0.5361606 | 0.9610153 |
| AKR7A3  | 0.0194217 | 0.8450918 | 0.7338536 | 0.9731916 |
| AADAC   | 0.0161736 | 0.8491429 | 0.7431951 | 0.9701944 |
| ACAT1   | 0.0017366 | 0.7153564 | 0.5800732 | 0.88219   |
| ACADM   | 0.0002281 | 0.6349163 | 0.4986608 | 0.8084026 |
| ACAA2   | 0.0019872 | 0.5769798 | 0.4071661 | 0.8176162 |
| ACOX1   | 0.0018799 | 0.4746077 | 0.296663  | 0.7592873 |
| ACSM1   | 0.0098443 | 0.7968052 | 0.6705762 | 0.9467955 |
| ACSL6   | 0.0214745 | 0.5082052 | 0.285422  | 0.9048796 |
| ACYP1   | 0.0155059 | 1.5464028 | 1.0864542 | 2.2010699 |
| ADH1B   | 8.74E-05  | 0.8399858 | 0.7699089 | 0.9164411 |
| ADH1A   | 0.031157  | 0.8921691 | 0.8042302 | 0.9897237 |
| ALDOA   | 0.0046023 | 1.3831803 | 1.1051868 | 1.7310989 |
| ALDH2   | 0.0099067 | 0.7501211 | 0.6028892 | 0.9333087 |
| BPNT1   | 0.0427143 | 2.1393797 | 1.0252819 | 4.4640853 |
| UGT1A10 | 0.0235062 | 0.3417442 | 0.1349644 | 0.8653322 |
| UGT2B15 | 0.0006293 | 0.7204453 | 0.5969827 | 0.8694415 |
| CHSY1   | 0.0072113 | 1.4214514 | 1.0998223 | 1.8371369 |
| CNDP2   | 0.0403005 | 0.728707  | 0.5384986 | 0.9861008 |
| CRYL1   | 0.0004028 | 0.728022  | 0.6106346 | 0.8679759 |
| EHHADH  | 0.0001411 | 0.7333528 | 0.6251128 | 0.8603349 |
| CSPG4   | 0.0318028 | 2.2857655 | 1.0746295 | 4.8618839 |
| CYB5R3  | 0.0021337 | 2.010802  | 1.2875118 | 3.1404177 |
| MAT2B   | 0.0371147 | 0.7381521 | 0.5548418 | 0.982025  |
| MGST3   | 0.0201073 | 0.7101488 | 0.5321107 | 0.9477563 |
| CYP2C8  | 0.0019794 | 0.7760136 | 0.6608288 | 0.9112754 |
| CYP2A6  | 0.0073426 | 0.8684976 | 0.7834354 | 0.9627954 |
| CYP7A1  | 0.0012563 | 0.8545162 | 0.7766652 | 0.9401708 |
| CYP4F3  | 0.0078471 | 0.817022  | 0.7039318 | 0.9482808 |
| CYP3A4  | 0.0047268 | 0.8548886 | 0.7667791 | 0.9531227 |
| CYP3A5  | 0.0135809 | 0.8435787 | 0.7369908 | 0.965582  |
| CYP2J2  | 0.0120756 | 0.812082  | 0.6902522 | 0.9554148 |
| CYP2R1  | 0.0197838 | 2.4701754 | 1.1545975 | 5.2847563 |
| ECHS1   | 0.0035634 | 0.6240656 | 0.4544874 | 0.8569168 |
| NUP107  | 0.0233929 | 1.3718936 | 1.0437489 | 1.803204  |
| NUP214  | 0.0273829 | 1.6450762 | 1.0570919 | 2.5601141 |
| NUP210  | 0.044039  | 1.4979054 | 1.0108447 | 2.2196489 |
| SUCLG2  | 0.0333711 | 0.7809065 | 0.621813  | 0.9807046 |
| SUCLG1  | 0.0337499 | 0.6779759 | 0.4735807 | 0.9705873 |
| SLC2A1  | 0.028275  | 1.4949387 | 1.0437299 | 2.1412071 |
| EPHX1   | 0.0017261 | 0.8173136 | 0.7204317 | 0.927224  |
| CHST11  | 0.0167547 | 1.5331605 | 1.0802475 | 2.1759654 |
| NUP37   | 0.0163826 | 1.4197131 | 1.0664001 | 1.8900834 |
| IMPAD1  | 0.0125399 | 1.357196  | 1.0678496 | 1.7249442 |

|         |           |           |           |           |
|---------|-----------|-----------|-----------|-----------|
| PPP1R3C | 0.0361281 | 1.1950069 | 1.011588  | 1.4116829 |
| FADS2   | 0.0127197 | 1.2589345 | 1.0503531 | 1.5089364 |
| FADS1   | 0.0050785 | 1.2304017 | 1.0642912 | 1.4224381 |

---
