# Supplementary material for: Development of Prognostic Features of Hepatocellular Carcinoma Based on Metabolic Gene Classification and Immune and Oxidative Stress Characteristic Analysis
Source: PubMed Central journal article supplement (PMC9969974; doi:10.1155/2023/1847700), 2023-02-18
Supplement: 1847700.f3.pdf [file 1847700.f3.pdf]

**Table S3. Prognosis genes in HCCDB18 dataset**

| <b>Genes</b> | <b>p.value</b> | <b>HR</b> | <b>Low 95%CI</b> | <b>High 95%CI</b> |
|--------------|----------------|-----------|------------------|-------------------|
| DERA         | 0.000876       | 3.604025  | 1.69366          | 7.669186          |
| IDH3A        | 0.031844       | 1.925783  | 1.058563         | 3.503465          |
| B4GALT4      | 6.08E-05       | 2.494113  | 1.59552          | 3.898793          |
| FADS1        | 0.005614       | 1.382982  | 1.099414         | 1.739689          |
| B3GAT3       | 0.006681       | 1.826779  | 1.181927         | 2.823456          |
| CYP2C8       | 3.71E-05       | 0.75861   | 0.665289         | 0.865021          |
| CYP4V2       | 0.004527       | 0.579407  | 0.397511         | 0.844538          |
| PPP2R5D      | 0.002851       | 2.25029   | 1.320778         | 3.833958          |
| MDH2         | 0.021519       | 1.795032  | 1.090046         | 2.955965          |
| NUP93        | 0.026024       | 1.919285  | 1.080992         | 3.407662          |
| NUP155       | 0.006939       | 1.964607  | 1.203272         | 3.207654          |
| ECHS1        | 0.044564       | 0.636913  | 0.410126         | 0.989105          |
| ACSL3        | 0.011832       | 1.656562  | 1.118205         | 2.45411           |
| SMOX         | 0.048743       | 1.345669  | 1.001638         | 1.807863          |
| CS           | 0.040437       | 1.680655  | 1.022879         | 2.761421          |
| ENO1         | 2.13E-05       | 1.932679  | 1.42634          | 2.618766          |
| PTGES3       | 3.50E-05       | 4.703781  | 2.259323         | 9.793003          |
| SHPK         | 0.008244       | 0.377403  | 0.183167         | 0.777613          |
| PFKFB4       | 0.031438       | 1.573351  | 1.041167         | 2.377556          |
| ACSM2A       | 0.001753       | 0.762126  | 0.642884         | 0.903485          |
| FDX1         | 0.006164       | 0.463698  | 0.267545         | 0.803663          |
| NUP85        | 0.021306       | 2.042203  | 1.112075         | 3.750279          |
| GLYATL1      | 0.000298       | 0.71428   | 0.595235         | 0.857134          |
| GRHPR        | 0.015388       | 0.635698  | 0.440664         | 0.917052          |
| LUM          | 0.032804       | 0.853688  | 0.73827          | 0.98715           |
| ADH1A        | 0.014495       | 0.836713  | 0.725281         | 0.965266          |
| ST3GAL4      | 0.04656        | 1.465735  | 1.005841         | 2.135905          |
| NAT2         | 0.002284       | 0.664594  | 0.511152         | 0.864099          |
| ACSM5        | 0.008468       | 0.749854  | 0.605209         | 0.929069          |
| AKR7A2       | 0.018953       | 1.925124  | 1.113919         | 3.327085          |
| GAPDH        | 7.55E-07       | 2.736576  | 1.836431         | 4.077935          |
| SLC37A4      | 0.01141        | 0.617306  | 0.424811         | 0.897027          |
| SDC2         | 0.019711       | 1.66375   | 1.084567         | 2.552229          |
| HSPG2        | 0.009599       | 0.59877   | 0.406163         | 0.882714          |
| TKT          | 0.000578       | 1.657615  | 1.243044         | 2.210452          |
| NUP107       | 0.006123       | 1.856323  | 1.192783         | 2.888989          |
| ACY3         | 0.038905       | 0.742288  | 0.559422         | 0.98493           |
| PDHB         | 0.012479       | 2.600263  | 1.228653         | 5.503074          |
| NUP205       | 0.03528        | 2.047416  | 1.050655         | 3.989809          |
| HEXB         | 0.03066        | 1.744026  | 1.053218         | 2.887936          |
| ADH1B        | 0.003209       | 0.819608  | 0.718038         | 0.935546          |
| SEC13        | 0.001262       | 2.958855  | 1.530236         | 5.721224          |

|         |          |          |          |          |
|---------|----------|----------|----------|----------|
| CYB5B   | 0.038609 | 1.519384 | 1.022158 | 2.258482 |
| HAGH    | 0.044454 | 0.681426 | 0.468778 | 0.990537 |
| ACADVL  | 0.012398 | 0.591774 | 0.392259 | 0.892769 |
| FMO2    | 0.003477 | 0.286675 | 0.124006 | 0.662729 |
| AKR7L   | 0.018119 | 0.731961 | 0.565064 | 0.948154 |
| HADH    | 0.019572 | 0.586596 | 0.374836 | 0.917988 |
| UGP2    | 0.002785 | 0.515499 | 0.333907 | 0.795848 |
| GGT5    | 0.003093 | 0.629957 | 0.463822 | 0.855599 |
| PPP2R1A | 0.018764 | 1.999839 | 1.121958 | 3.56462  |
| GLO1    | 0.001853 | 2.076712 | 1.310807 | 3.290135 |
| HK1     | 0.034559 | 0.641831 | 0.425432 | 0.968302 |
| LDHA    | 0.001459 | 2.174992 | 1.347856 | 3.509713 |
| GLYAT   | 0.000241 | 0.759438 | 0.655686 | 0.879608 |
| RPE     | 0.005343 | 2.970572 | 1.38086  | 6.390438 |
| NUP43   | 0.030709 | 2.068634 | 1.069903 | 3.99966  |
| ADH4    | 0.040869 | 0.885128 | 0.787431 | 0.994947 |
| CYP3A4  | 0.000347 | 0.80752  | 0.71826  | 0.907873 |
| CYP2W1  | 0.001901 | 3.222629 | 1.539742 | 6.744855 |
| B3GALT6 | 0.004566 | 2.043894 | 1.24713  | 3.349692 |
| DLAT    | 0.008943 | 1.73673  | 1.148146 | 2.627044 |
| HADHA   | 0.016976 | 2.351034 | 1.165329 | 4.743175 |
| G6PD    | 0.000811 | 1.450914 | 1.166925 | 1.804017 |
| RPIA    | 0.000353 | 2.761199 | 1.581783 | 4.820018 |
| FBP1    | 0.033033 | 0.794941 | 0.643722 | 0.981683 |
| CYP2C18 | 0.027085 | 0.765659 | 0.604233 | 0.970211 |
| PCK2    | 0.018578 | 0.673135 | 0.484141 | 0.935907 |
| ALDH9A1 | 0.001099 | 0.37202  | 0.205438 | 0.673677 |
| PDP1    | 0.03153  | 0.570348 | 0.341874 | 0.951509 |
| CHST5   | 0.000325 | 2.529707 | 1.525122 | 4.196004 |
| PGK1    | 0.034297 | 1.55332  | 1.033121 | 2.33545  |
| SLC35B2 | 0.001856 | 2.160278 | 1.330017 | 3.508827 |
| HS2ST1  | 0.009353 | 2.469479 | 1.248879 | 4.883041 |
| ACSL6   | 0.031954 | 0.66487  | 0.457893 | 0.965406 |
| ACACA   | 0.003501 | 2.270553 | 1.309442 | 3.937107 |
| SLC26A2 | 0.021778 | 1.940375 | 1.101394 | 3.418447 |
| ACOT7   | 0.000759 | 2.047924 | 1.349297 | 3.108281 |
| CHST7   | 0.001911 | 0.358834 | 0.18785  | 0.685451 |
| CYP4A11 | 0.014236 | 0.812342 | 0.687969 | 0.959201 |
| GGT1    | 0.049251 | 1.276731 | 1.000802 | 1.628735 |
| SLC16A1 | 0.005267 | 1.530277 | 1.134959 | 2.063288 |
| CYP4F2  | 0.002731 | 0.749913 | 0.621237 | 0.905242 |
| CYP21A2 | 0.01736  | 0.653347 | 0.460096 | 0.927768 |
| AHCY    | 5.00E-08 | 3.405148 | 2.191835 | 5.290102 |
| MAOB    | 0.048855 | 0.743613 | 0.553784 | 0.998514 |

|          |          |          |          |          |
|----------|----------|----------|----------|----------|
| UGT2B15  | 0.000482 | 0.772779 | 0.668656 | 0.893116 |
| SLC35D2  | 0.000807 | 2.612206 | 1.489557 | 4.580973 |
| IDS      | 0.005826 | 0.518246 | 0.324811 | 0.826879 |
| MAT2A    | 0.010472 | 2.115674 | 1.191971 | 3.755191 |
| CPT1B    | 0.005634 | 0.64915  | 0.478066 | 0.881461 |
| HYAL3    | 0.004052 | 1.801576 | 1.205903 | 2.691492 |
| POM121C  | 0.009496 | 2.778674 | 1.283636 | 6.014965 |
| ELOVL5   | 0.010694 | 1.982175 | 1.172144 | 3.351991 |
| TRMT112  | 0.026284 | 1.954292 | 1.082218 | 3.529102 |
| CYP2C19  | 0.003182 | 0.628411 | 0.461508 | 0.855674 |
| SEH1L    | 1.70E-05 | 3.22539  | 1.891626 | 5.499575 |
| GYG1     | 0.042088 | 1.510004 | 1.014845 | 2.246757 |
| CHST13   | 0.000495 | 1.884271 | 1.319277 | 2.69123  |
| SUCLG1   | 0.022822 | 1.955561 | 1.097715 | 3.483801 |
| POM121   | 0.03622  | 2.069699 | 1.047813 | 4.088186 |
| VDAC1    | 0.003302 | 2.482511 | 1.353533 | 4.553166 |
| OMD      | 0.029122 | 0.332024 | 0.123319 | 0.89394  |
| ACACB    | 0.019654 | 0.585099 | 0.372964 | 0.91789  |
| CYP27A1  | 0.022808 | 0.700382 | 0.515446 | 0.95167  |
| FUT2     | 0.036755 | 1.545623 | 1.027155 | 2.325793 |
| B4GALT2  | 0.010103 | 1.802937 | 1.150629 | 2.825048 |
| GPC5     | 0.007769 | 1.693737 | 1.149074 | 2.496572 |
| UGT2B28  | 0.03095  | 2.008195 | 1.065986 | 3.783212 |
| ACYP2    | 0.010197 | 0.459457 | 0.253845 | 0.83161  |
| AADAC    | 0.024683 | 0.790071 | 0.643248 | 0.970408 |
| ACSM2B   | 0.000738 | 0.732023 | 0.610737 | 0.877395 |
| LDHAL6B  | 0.021005 | 0.006668 | 9.46E-05 | 0.469839 |
| PGD      | 0.000947 | 1.720721 | 1.247265 | 2.373899 |
| B3GAT1   | 0.019426 | 0.275308 | 0.093339 | 0.812036 |
| ACADL    | 4.29E-05 | 0.562025 | 0.426456 | 0.74069  |
| DCN      | 0.013638 | 0.836052 | 0.725172 | 0.963886 |
| CES2     | 0.0116   | 0.754608 | 0.606416 | 0.939014 |
| HSP90AB1 | 0.012738 | 1.735291 | 1.124687 | 2.677397 |
| GGCT     | 3.77E-06 | 3.195992 | 1.953053 | 5.229949 |
| ACAT2    | 0.005346 | 1.758996 | 1.182183 | 2.61725  |
| CYP4A22  | 0.038898 | 0.799551 | 0.646616 | 0.988659 |
| PFKFB1   | 0.005952 | 0.725909 | 0.577759 | 0.912048 |
| GCKR     | 0.029338 | 0.78228  | 0.627249 | 0.975629 |
| CES3     | 0.00667  | 0.69684  | 0.536788 | 0.904614 |
| PRELP    | 0.019912 | 0.664495 | 0.471027 | 0.937427 |
| PGP      | 0.005619 | 2.043267 | 1.232218 | 3.388151 |
| FMO3     | 4.08E-05 | 0.698857 | 0.588916 | 0.829322 |
| CYP3A5   | 6.88E-05 | 0.711259 | 0.6014   | 0.841186 |
| TPMT     | 0.000358 | 0.256868 | 0.121781 | 0.5418   |

|         |          |          |          |          |
|---------|----------|----------|----------|----------|
| IDH3B   | 0.010372 | 2.447546 | 1.23448  | 4.852634 |
| HMMR    | 2.58E-05 | 2.498892 | 1.631063 | 3.828461 |
| GPC3    | 0.009526 | 1.218061 | 1.049311 | 1.413949 |
| MTRR    | 0.048495 | 2.093142 | 1.004895 | 4.359903 |
| PGAM1   | 0.01932  | 1.74607  | 1.09459  | 2.785299 |
| ALDOA   | 0.016078 | 1.434395 | 1.069312 | 1.924123 |
| ACAT1   | 0.004988 | 0.61724  | 0.440739 | 0.864425 |
| AKR7A3  | 0.016216 | 0.806108 | 0.676203 | 0.96097  |
| CYP2A6  | 0.006455 | 0.850153 | 0.756422 | 0.955498 |
| ALDOB   | 0.026975 | 0.863941 | 0.758931 | 0.983481 |
| HS3ST2  | 0.045492 | 0.582386 | 0.342871 | 0.989217 |
| ADH1C   | 2.48E-07 | 0.752422 | 0.675348 | 0.838293 |
| SULT1B1 | 0.01675  | 0.582882 | 0.374553 | 0.907084 |
| ALDH2   | 0.022862 | 0.67831  | 0.485564 | 0.947567 |
| MDH1    | 0.025543 | 1.915894 | 1.082769 | 3.390056 |
| DLD     | 0.045634 | 1.692837 | 1.01027  | 2.836565 |
| EHHADH  | 0.024492 | 0.756315 | 0.592938 | 0.964709 |
| PHKG1   | 0.033026 | 0.148849 | 0.025832 | 0.857687 |
| DSE     | 0.009543 | 0.481231 | 0.276797 | 0.836656 |
| D2HGDH  | 0.003582 | 0.48611  | 0.299187 | 0.789817 |
| ACSM1   | 0.005947 | 0.779388 | 0.652565 | 0.930857 |
| NUP37   | 0.003151 | 2.210499 | 1.30562  | 3.742516 |
| NUP35   | 0.000456 | 3.423778 | 1.720425 | 6.813584 |
| TPI1    | 5.87E-07 | 3.026742 | 1.960039 | 4.673972 |
| CYP2C9  | 0.009757 | 0.831318 | 0.722634 | 0.956348 |
| CYP4F3  | 0.043283 | 0.778366 | 0.610453 | 0.992465 |
| IDUA    | 0.027378 | 0.565392 | 0.340666 | 0.938362 |
| SUCLA2  | 0.009673 | 2.684721 | 1.270557 | 5.672885 |
| B3GNT3  | 0.016793 | 1.444205 | 1.068535 | 1.951951 |
| GSTM2   | 0.001729 | 0.516228 | 0.341358 | 0.78068  |
| SLC2A1  | 0.025969 | 1.365704 | 1.038038 | 1.7968   |
| GYS2    | 0.005092 | 0.754129 | 0.619005 | 0.918749 |
| RPS27A  | 2.16E-05 | 2.792891 | 1.738754 | 4.48611  |
| NAT1    | 0.003252 | 0.397474 | 0.215003 | 0.734808 |
| CYP8B1  | 0.006644 | 0.826448 | 0.720171 | 0.94841  |
| CYP1A2  | 0.009939 | 0.721232 | 0.562565 | 0.924651 |
| HS6ST3  | 0.028975 | 38.95298 | 1.455609 | 1042.406 |
| FUT9    | 0.000138 | 81.73271 | 8.494185 | 786.4481 |
| PRKACG  | 0.026238 | 9.21E+25 | 1171.707 | 7.23E+48 |

---
