# Supplementary material for: Development of Prognostic Features of Hepatocellular Carcinoma Based on Metabolic Gene Classification and Immune and Oxidative Stress Characteristic Analysis
Source: PubMed Central journal article supplement (PMC9969974; doi:10.1155/2023/1847700), 2023-02-18
Supplement: 1847700.f4.pdf [file 1847700.f4.pdf]

**Table S4. Prognosis genes in TCGA dataset**

| <b>Genes</b> | <b>p.value</b> | <b>HR</b> | <b>Low 95%CI</b> | <b>High 95%CI</b> |
|--------------|----------------|-----------|------------------|-------------------|
| SLC2A1       | 6.23E-08       | 1.404285  | 1.241808         | 1.58802           |
| LDHA         | 4.73E-07       | 1.797589  | 1.430826         | 2.258364          |
| ALDOA        | 1.45E-05       | 1.36001   | 1.183541         | 1.562791          |
| PRKACB       | 0.009016       | 1.348389  | 1.077419         | 1.687507          |
| CSPG4        | 0.044247       | 1.21524   | 1.00503          | 1.469417          |
| XYLT2        | 0.02354        | 1.355974  | 1.04181          | 1.764877          |
| MANBA        | 0.001817       | 1.484082  | 1.157981         | 1.902016          |
| CYP8B1       | 0.015662       | 0.934055  | 0.88378          | 0.98719           |
| BPGM         | 0.033611       | 1.333604  | 1.022573         | 1.73924           |
| ENO1         | 5.52E-08       | 1.605688  | 1.353558         | 1.904781          |
| NUP210       | 0.000937       | 1.356493  | 1.132356         | 1.624996          |
| GLYAT        | 0.037058       | 0.930304  | 0.869227         | 0.995673          |
| MAT1A        | 0.037672       | 0.907753  | 0.828573         | 0.9945            |
| TRMT112      | 0.001041       | 1.683545  | 1.233141         | 2.298459          |
| PCK1         | 0.02286        | 0.9264    | 0.86737          | 0.989448          |
| GNPDA1       | 1.64E-06       | 1.642391  | 1.340811         | 2.011803          |
| FBP1         | 0.017403       | 0.895235  | 0.817192         | 0.98073           |
| ADH4         | 1.35E-05       | 0.893516  | 0.849335         | 0.939994          |
| NUP58        | 0.009495       | 1.396161  | 1.08496          | 1.796626          |
| SDC3         | 0.003792       | 1.300278  | 1.088505         | 1.553253          |
| NUP98        | 0.01529        | 1.407877  | 1.067854         | 1.856168          |
| ACSM2A       | 0.004296       | 0.880634  | 0.807058         | 0.960917          |
| NUP85        | 3.02E-06       | 1.825171  | 1.417814         | 2.349566          |
| RPIA         | 3.87E-05       | 1.703765  | 1.321886         | 2.195966          |
| ADH1A        | 0.006141       | 0.904956  | 0.842567         | 0.971965          |
| BPNT1        | 0.029051       | 1.347272  | 1.030898         | 1.76074           |
| CYP11A1      | 0.017749       | 0.861593  | 0.761756         | 0.974514          |
| FDX2         | 0.005335       | 1.366319  | 1.096967         | 1.701809          |
| MTRR         | 0.009493       | 1.380632  | 1.082003         | 1.761681          |
| AKR7A3       | 0.005742       | 0.894689  | 0.82676          | 0.968199          |
| B3GALT6      | 0.027598       | 1.367672  | 1.035141         | 1.807028          |
| NUP188       | 0.000583       | 1.49073   | 1.187384         | 1.871572          |
| HSP90AB1     | 0.002343       | 1.414431  | 1.131334         | 1.768369          |
| CYP3A4       | 0.022136       | 0.946566  | 0.903069         | 0.992157          |
| GCDH         | 0.007787       | 0.761161  | 0.622563         | 0.930613          |
| FMO2         | 0.027272       | 0.725997  | 0.546347         | 0.964718          |
| SGSH         | 0.011775       | 1.41513   | 1.080084         | 1.854109          |
| ACAT1        | 0.000743       | 0.740303  | 0.621628         | 0.881634          |
| CS           | 0.03582        | 1.247816  | 1.014769         | 1.534384          |
| FMO3         | 0.003538       | 0.897945  | 0.835284         | 0.965307          |
| ALDH2        | 0.000258       | 0.725487  | 0.610776         | 0.861743          |
| PAPSS1       | 0.001136       | 1.384102  | 1.138017         | 1.6834            |

|         |          |          |          |          |
|---------|----------|----------|----------|----------|
| HYAL3   | 0.04711  | 1.178032 | 1.002094 | 1.384859 |
| BAAT    | 0.018158 | 0.894079 | 0.814769 | 0.981109 |
| B4GALT5 | 0.000218 | 1.390953 | 1.1677   | 1.656891 |
| GYS2    | 0.00293  | 0.889149 | 0.822922 | 0.960707 |
| TBXAS1  | 0.038865 | 1.248845 | 1.01143  | 1.541988 |
| HS2ST1  | 0.000364 | 1.582034 | 1.229387 | 2.035837 |
| SULT1C2 | 0.007407 | 1.157915 | 1.040094 | 1.289083 |
| ST3GAL4 | 0.004273 | 1.33562  | 1.095141 | 1.628905 |
| FUT11   | 0.011633 | 1.39293  | 1.07677  | 1.801921 |
| ADH1B   | 0.001709 | 0.896665 | 0.837587 | 0.95991  |
| UBC     | 0.012758 | 1.514766 | 1.092484 | 2.100275 |
| PPARD   | 0.014249 | 1.2706   | 1.049144 | 1.538802 |
| FUT10   | 0.011009 | 1.509553 | 1.098936 | 2.073597 |
| CRYL1   | 0.046675 | 0.847677 | 0.720306 | 0.997571 |
| GPC1    | 0.000564 | 1.265453 | 1.106955 | 1.446646 |
| PGK1    | 0.000831 | 1.375429 | 1.140929 | 1.658126 |
| NDC1    | 3.03E-07 | 1.828368 | 1.451344 | 2.303335 |
| SLC9A1  | 0.031912 | 1.217466 | 1.017163 | 1.457212 |
| B4GALT6 | 0.004879 | 1.388808 | 1.104904 | 1.74566  |
| PKM     | 0.000157 | 1.203767 | 1.093408 | 1.325266 |
| CYP2C9  | 9.39E-05 | 0.87919  | 0.824182 | 0.93787  |
| NUP54   | 0.005296 | 1.477343 | 1.12294  | 1.943597 |
| PGM2L1  | 0.00871  | 1.353156 | 1.079469 | 1.696232 |
| NUP35   | 0.007809 | 1.503427 | 1.113304 | 2.030257 |
| HAGH    | 0.001774 | 0.740585 | 0.613465 | 0.894046 |
| GALNS   | 0.000139 | 1.528756 | 1.228917 | 1.901752 |
| ACOT7   | 0.000103 | 1.531918 | 1.235201 | 1.899912 |
| LDHD    | 0.000336 | 0.785102 | 0.687843 | 0.896112 |
| SLC37A1 | 0.017948 | 1.274635 | 1.042585 | 1.558334 |
| GGT7    | 0.006605 | 1.34796  | 1.08668  | 1.672062 |
| PPP2CA  | 0.000883 | 1.937987 | 1.312152 | 2.862316 |
| G6PC3   | 0.001368 | 1.347388 | 1.122568 | 1.617233 |
| ALDOB   | 0.00996  | 0.921056 | 0.865218 | 0.980497 |
| GSS     | 0.00059  | 1.72754  | 1.264738 | 2.359695 |
| GAPDH   | 2.16E-05 | 1.577504 | 1.278278 | 1.946774 |
| GLO1    | 0.029642 | 1.301631 | 1.026388 | 1.650685 |
| TPR     | 0.014708 | 1.288311 | 1.051057 | 1.57912  |
| GYS1    | 0.004283 | 1.370005 | 1.103859 | 1.700321 |
| CHST12  | 0.002542 | 1.64604  | 1.190952 | 2.275028 |
| PYGB    | 0.002032 | 1.295769 | 1.099129 | 1.527589 |
| PHKA2   | 6.96E-05 | 1.64558  | 1.287454 | 2.103324 |
| B4GAT1  | 0.049949 | 1.256409 | 1.000051 | 1.578483 |
| NUP205  | 2.27E-05 | 1.604697 | 1.289378 | 1.997128 |
| AGRN    | 0.000339 | 1.290797 | 1.122593 | 1.484205 |

|          |          |          |          |          |
|----------|----------|----------|----------|----------|
| EXT2     | 0.003404 | 1.527973 | 1.150531 | 2.02924  |
| B3GNT7   | 0.007092 | 1.191604 | 1.048849 | 1.353789 |
| ABCC5    | 2.21E-06 | 1.878854 | 1.447023 | 2.439554 |
| NDST2    | 0.002993 | 2.59188  | 1.382052 | 4.860774 |
| B4GALT2  | 9.16E-06 | 1.79504  | 1.386179 | 2.324496 |
| MAT2A    | 0.021112 | 1.220549 | 1.030356 | 1.445849 |
| ECHS1    | 0.008402 | 0.727818 | 0.57466  | 0.921795 |
| CYP2S1   | 0.019481 | 1.168594 | 1.025409 | 1.331774 |
| AIP      | 0.019829 | 1.406387 | 1.055596 | 1.87375  |
| IDH3G    | 0.03291  | 1.313874 | 1.022414 | 1.688422 |
| SORD     | 0.006817 | 0.851114 | 0.757306 | 0.956543 |
| CYB5B    | 0.036098 | 1.300976 | 1.017202 | 1.663914 |
| CHST11   | 0.007533 | 1.211894 | 1.052564 | 1.395342 |
| CYB5R3   | 0.000616 | 1.546301 | 1.204923 | 1.984399 |
| SLC37A2  | 0.003798 | 1.353959 | 1.102781 | 1.662349 |
| GLYATL1  | 0.001135 | 0.858253 | 0.782777 | 0.941006 |
| CYP3A43  | 0.006308 | 0.803447 | 0.686681 | 0.940068 |
| CYP2R1   | 0.04176  | 1.357308 | 1.011461 | 1.82141  |
| GCLM     | 0.00012  | 1.404908 | 1.181479 | 1.67059  |
| PTGS1    | 0.001331 | 1.29448  | 1.105692 | 1.515501 |
| HACD2    | 0.018352 | 1.22836  | 1.035362 | 1.457334 |
| PFKFB4   | 3.14E-08 | 1.598565 | 1.353836 | 1.887533 |
| ACADS    | 0.006198 | 0.738897 | 0.594951 | 0.917669 |
| CHST1    | 0.002332 | 1.26062  | 1.08599  | 1.463331 |
| CHPF2    | 0.00031  | 1.608194 | 1.242224 | 2.081982 |
| HMMR     | 8.41E-07 | 1.449992 | 1.250707 | 1.681031 |
| NUP160   | 0.005414 | 1.380683 | 1.099943 | 1.733075 |
| AS3MT    | 0.009578 | 0.769636 | 0.63133  | 0.938241 |
| GALE     | 0.024439 | 1.327244 | 1.037185 | 1.69842  |
| AHCY     | 0.030733 | 1.296574 | 1.024402 | 1.641058 |
| NUP155   | 6.40E-06 | 1.728065 | 1.362642 | 2.191485 |
| TPI1     | 6.05E-05 | 1.650077 | 1.291862 | 2.10762  |
| HPSE     | 0.029005 | 1.277946 | 1.025417 | 1.592664 |
| B4GALT7  | 0.013135 | 1.454993 | 1.081819 | 1.956893 |
| SLC35B2  | 0.006272 | 1.36147  | 1.091218 | 1.698655 |
| SLC25A12 | 0.037702 | 1.237528 | 1.012187 | 1.513037 |
| UGP2     | 0.023009 | 0.798542 | 0.657751 | 0.96947  |
| YOD1     | 0.016017 | 1.33075  | 1.054658 | 1.679118 |
| CALM1    | 0.002817 | 1.633778 | 1.183877 | 2.254652 |
| RPE      | 8.72E-05 | 1.751125 | 1.323657 | 2.316642 |
| PGD      | 5.40E-06 | 1.513676 | 1.266074 | 1.8097   |
| B4GALT4  | 0.000668 | 1.558863 | 1.207101 | 2.013131 |
| EHHADH   | 0.021571 | 0.878558 | 0.7867   | 0.981142 |
| GLB1L    | 0.029426 | 1.218487 | 1.019957 | 1.455659 |

|          |          |          |          |          |
|----------|----------|----------|----------|----------|
| UGDH     | 0.001633 | 1.28272  | 1.098622 | 1.497667 |
| AAAS     | 0.002452 | 1.713281 | 1.209305 | 2.42729  |
| GNS      | 0.005583 | 1.363871 | 1.095109 | 1.698593 |
| SULT2A1  | 0.01188  | 0.922231 | 0.865858 | 0.982274 |
| ACSL6    | 0.027343 | 0.826922 | 0.698479 | 0.978984 |
| ENO2     | 0.002891 | 1.198014 | 1.063756 | 1.349218 |
| PDK4     | 0.014201 | 0.880679 | 0.79563  | 0.97482  |
| NUP214   | 0.024516 | 1.433192 | 1.047333 | 1.96121  |
| NUP43    | 4.42E-06 | 1.853027 | 1.423987 | 2.411334 |
| GNPDA2   | 0.001798 | 1.571103 | 1.183091 | 2.08637  |
| BSG      | 0.000149 | 1.420415 | 1.184853 | 1.702809 |
| ACACA    | 0.000303 | 1.5019   | 1.204524 | 1.872692 |
| CYP4V2   | 0.015253 | 0.808618 | 0.681113 | 0.959993 |
| G6PD     | 1.07E-09 | 1.386029 | 1.247981 | 1.539347 |
| PPP2R5D  | 0.012416 | 1.33964  | 1.065208 | 1.684774 |
| HYAL2    | 0.024744 | 1.389064 | 1.042656 | 1.85056  |
| HSD17B12 | 0.00077  | 1.523345 | 1.192    | 1.946797 |
| UGT1A6   | 0.021191 | 1.129301 | 1.018349 | 1.252342 |
| CYP27A1  | 0.004366 | 0.850204 | 0.760438 | 0.950568 |
| GGCT     | 0.000447 | 1.656565 | 1.249772 | 2.195768 |
| PFKFB3   | 0.00459  | 1.161731 | 1.047339 | 1.288616 |
| DLAT     | 3.12E-05 | 1.580616 | 1.274235 | 1.960664 |
| ECI1     | 0.006077 | 0.670571 | 0.504035 | 0.892132 |
| VCAN     | 0.032582 | 1.121894 | 1.009584 | 1.246697 |
| CYP3A5   | 0.007051 | 0.870995 | 0.787738 | 0.963051 |
| ME1      | 0.000674 | 1.199506 | 1.080085 | 1.332131 |
| HADHA    | 0.000428 | 1.87096  | 1.320264 | 2.651355 |
| GYG1     | 4.36E-05 | 1.653096 | 1.299027 | 2.103672 |
| AKR1B1   | 0.031059 | 1.142373 | 1.012194 | 1.289293 |
| TALDO1   | 5.57E-05 | 1.522993 | 1.241228 | 1.86872  |
| NUP107   | 4.24E-05 | 1.651    | 1.298689 | 2.098887 |
| HEXB     | 0.000348 | 1.687302 | 1.266733 | 2.247503 |
| ACYP1    | 3.49E-07 | 1.870727 | 1.470191 | 2.380386 |
| PDK3     | 0.000286 | 1.458755 | 1.189548 | 1.788886 |
| CYP7A1   | 0.004153 | 0.908505 | 0.850808 | 0.970114 |
| SLC26A2  | 0.001803 | 1.407934 | 1.135723 | 1.745389 |
| ACSL3    | 0.000875 | 1.43337  | 1.159493 | 1.771939 |
| VDAC1    | 0.001266 | 1.646785 | 1.215951 | 2.23027  |
| ACSS1    | 0.020612 | 1.182507 | 1.026044 | 1.362829 |
| PPP2R1A  | 0.007245 | 1.392418 | 1.093546 | 1.772973 |
| ST3GAL2  | 0.003037 | 1.605809 | 1.174021 | 2.196403 |
| GRHPR    | 0.023027 | 0.802407 | 0.663675 | 0.970139 |
| NUP93    | 3.26E-05 | 1.699621 | 1.323344 | 2.182888 |
| SEH1L    | 0.000389 | 1.823848 | 1.308558 | 2.542052 |

|         |          |          |          |          |
|---------|----------|----------|----------|----------|
| PTGES3  | 0.000369 | 1.775481 | 1.294498 | 2.435178 |
| ADHFE1  | 0.018259 | 0.847211 | 0.73824  | 0.972267 |
| ACADL   | 0.019767 | 0.869593 | 0.773189 | 0.978017 |
| 2-Mar   | 0.000206 | 0.749007 | 0.643001 | 0.87249  |
| SLC16A3 | 7.43E-07 | 1.326289 | 1.185977 | 1.483201 |
| PGP     | 0.014335 | 1.272891 | 1.049342 | 1.544065 |
| GSTM3   | 0.031925 | 1.146988 | 1.011921 | 1.300083 |
| NUP50   | 0.008858 | 1.411477 | 1.090431 | 1.827047 |
| TKT     | 3.14E-05 | 1.350137 | 1.172178 | 1.555113 |
| CYP2C8  | 0.025178 | 0.927575 | 0.868487 | 0.990684 |
| CHP1    | 0.019804 | 0.749333 | 0.587834 | 0.955202 |
| GSTZ1   | 0.038822 | 0.831984 | 0.698767 | 0.990598 |
| B4GALT3 | 7.14E-05 | 1.676861 | 1.299299 | 2.164138 |
| ME2     | 0.000469 | 1.491699 | 1.192253 | 1.866352 |
| ME3     | 0.041836 | 1.211871 | 1.007125 | 1.458241 |
| IDH3B   | 0.005581 | 1.557829 | 1.138599 | 2.131419 |
| SMOX    | 5.35E-06 | 1.371374 | 1.19696  | 1.571202 |
| ACOT12  | 0.000247 | 0.838062 | 0.762522 | 0.921084 |
| GOT2    | 0.00012  | 0.667349 | 0.543043 | 0.82011  |
| HK2     | 0.000743 | 1.21354  | 1.084464 | 1.357978 |
| B3GAT3  | 3.57E-06 | 1.811124 | 1.408854 | 2.328254 |
| NCOA1   | 0.049737 | 1.296173 | 1.000298 | 1.679565 |
| UGT2B15 | 0.005904 | 0.911988 | 0.854092 | 0.973809 |
| CHAC2   | 4.23E-06 | 1.905096 | 1.447601 | 2.507176 |
| SEC13   | 0.000212 | 1.772886 | 1.309471 | 2.400302 |
| RAE1    | 7.95E-06 | 1.895719 | 1.431801 | 2.509951 |
| CYP4A11 | 0.045338 | 0.921245 | 0.850139 | 0.998299 |
| PGAM1   | 0.031083 | 1.300288 | 1.024164 | 1.650857 |
| ADH1C   | 0.002907 | 0.9178   | 0.867412 | 0.971115 |
| SLC35D2 | 0.008338 | 1.404081 | 1.091153 | 1.806752 |
| PFKP    | 0.000192 | 1.20361  | 1.091905 | 1.326742 |
| GLB1    | 0.003526 | 1.448525 | 1.129343 | 1.857915 |
| PECR    | 0.036606 | 0.851885 | 0.732989 | 0.990066 |
| G6PC    | 0.000444 | 0.881634 | 0.821784 | 0.945843 |
| NUP37   | 2.41E-05 | 1.732634 | 1.342486 | 2.236166 |
| NUP153  | 0.049613 | 1.200148 | 1.000308 | 1.439911 |
| NUP62   | 3.25E-05 | 1.627449 | 1.29344  | 2.04771  |
| HK3     | 0.036714 | 1.204431 | 1.01155  | 1.434091 |
| ACY3    | 0.033493 | 0.877532 | 0.777966 | 0.989842 |
| RPS27A  | 0.008058 | 1.329557 | 1.076959 | 1.641401 |

---
