# Supplementary material for: Development of Prognostic Features of Hepatocellular Carcinoma Based on Metabolic Gene Classification and Immune and Oxidative Stress Characteristic Analysis
Source: PubMed Central journal article supplement (PMC9969974; doi:10.1155/2023/1847700), 2023-02-18

**S7\_Fig.1. There were significant differences in the pancancer immunotypes**

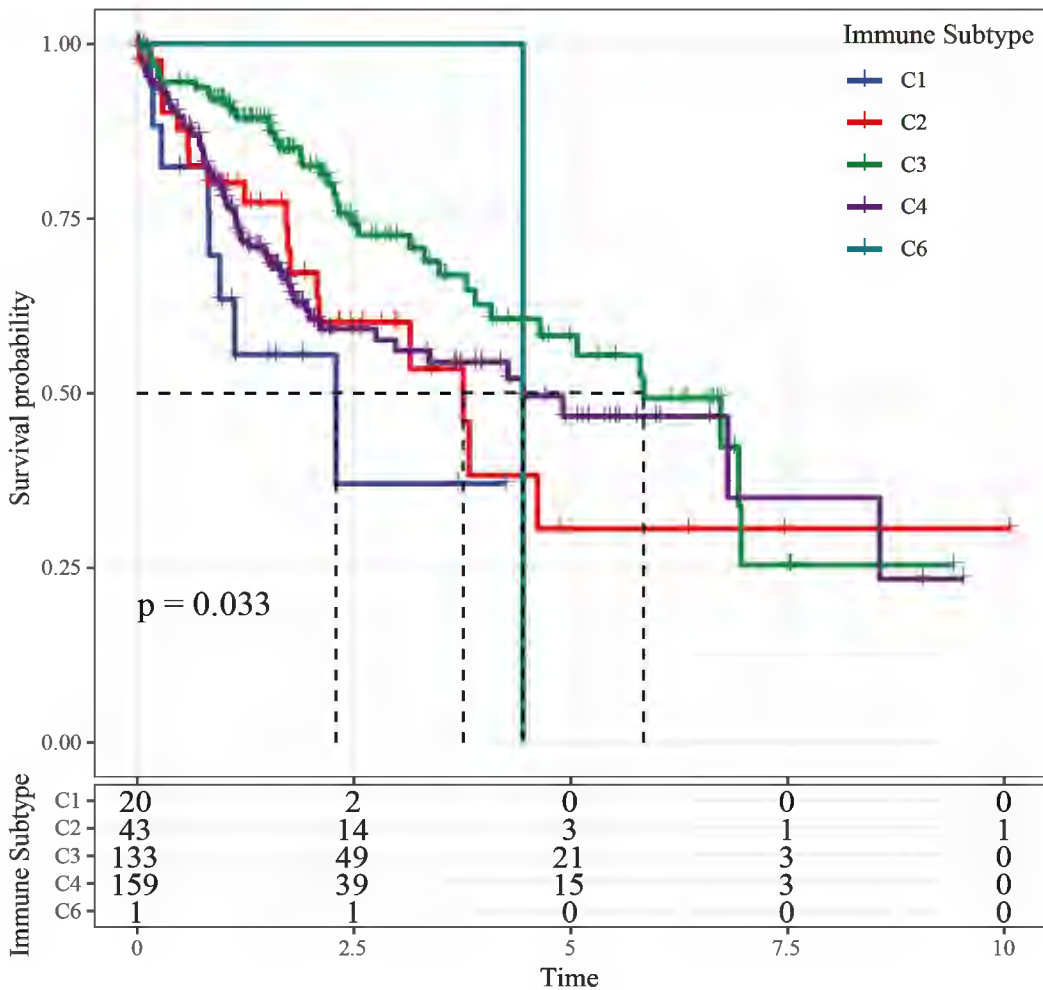

Supplement: 1847700.f5.pdf [file 1847700.f5.pdf]
