# Supplementary material for: Development of Prognostic Features of Hepatocellular Carcinoma Based on Metabolic Gene Classification and Immune and Oxidative Stress Characteristic Analysis
Source: PubMed Central journal article supplement (PMC9969974; doi:10.1155/2023/1847700), 2023-02-18

**S8 Fig. 2. Dark module was related to tumor processes.(a)Biological process;(b)cellular component;(c)molecular function;(d)KEGG pathway**

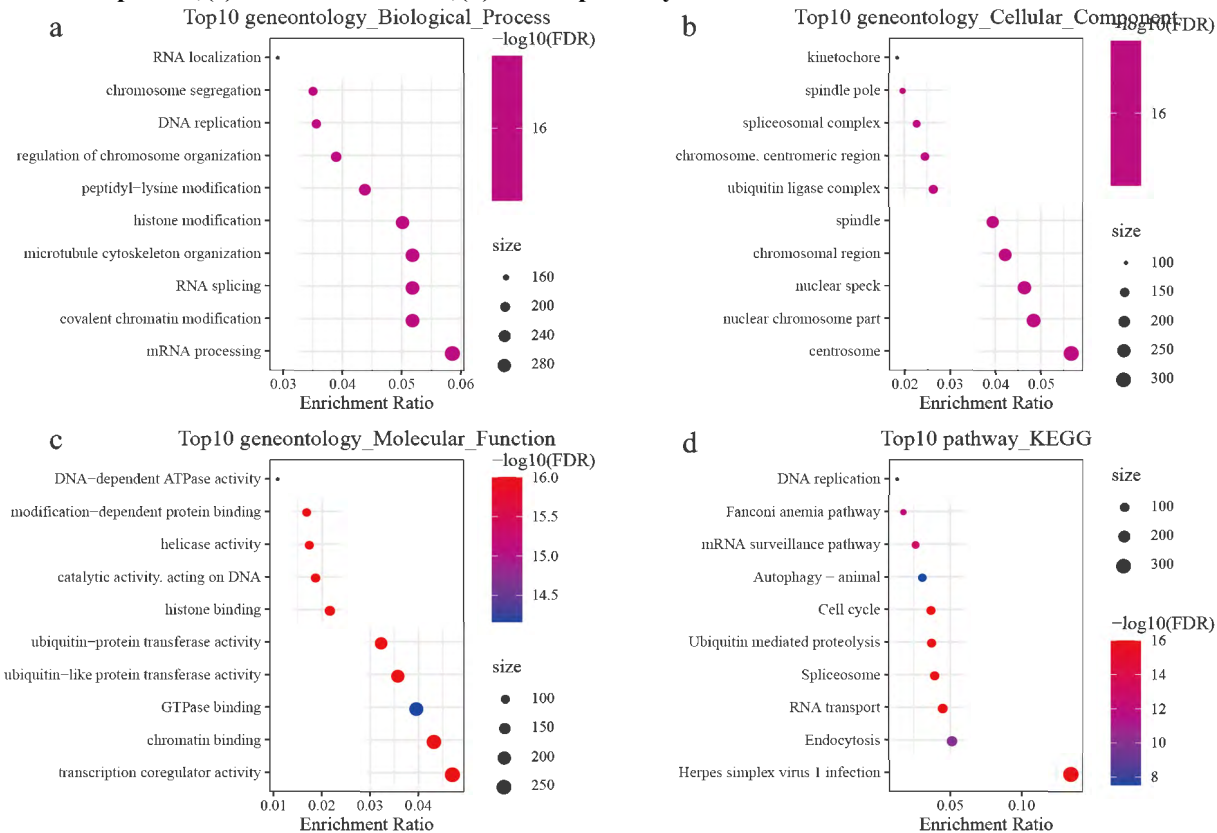

Supplement: 1847700.f6.pdf [file 1847700.f6.pdf]
