# Supplementary material for: Development of Prognostic Features of Hepatocellular Carcinoma Based on Metabolic Gene Classification and Immune and Oxidative Stress Characteristic Analysis
Source: PubMed Central journal article supplement (PMC9969974; doi:10.1155/2023/1847700), 2023-02-18

**S9\_Fig. 3. Green module was related to nervous system disease; (a) Biological process; (b) cellular component; (c) molecular function; (d) KEGG pathway**

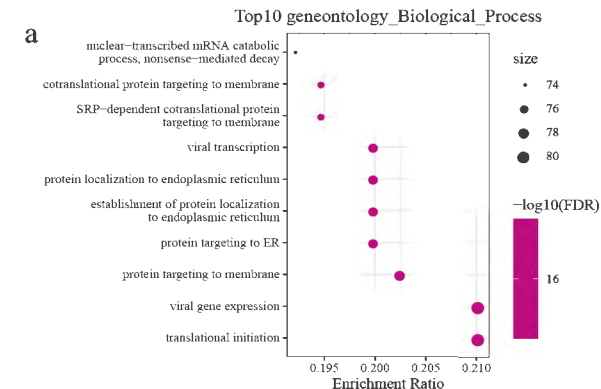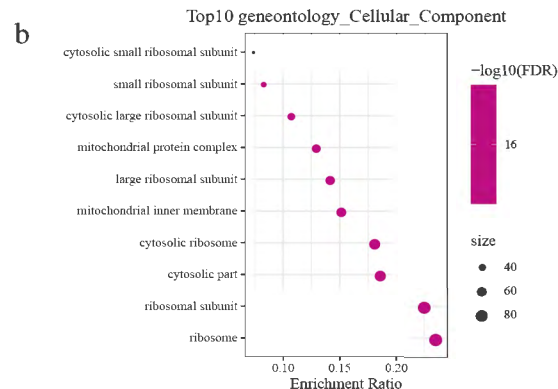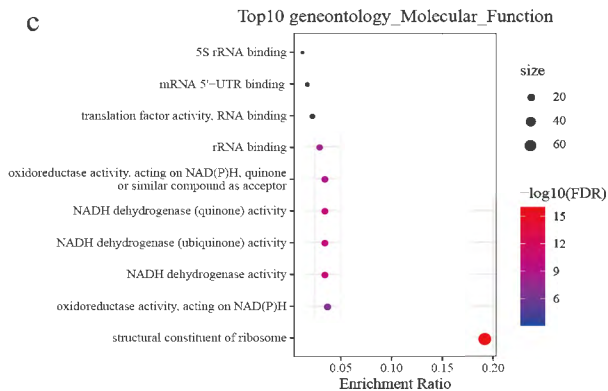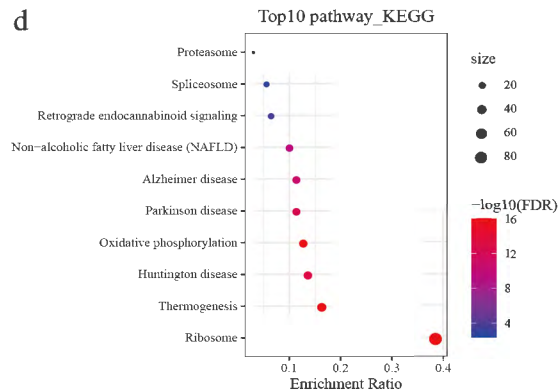

Supplement: 1847700.f7.pdf [file 1847700.f7.pdf]
